# Supplementary material for: Adsorptive Behavior of Prepared Metal-Organic Framework Composites on Phosphates in Aqueous Solutions
Source: Hindawi journal article supplement (doi:10.1155/2021/6690361), 2021-01-01
Supplement: f1 [file 6690361.f1.docx]

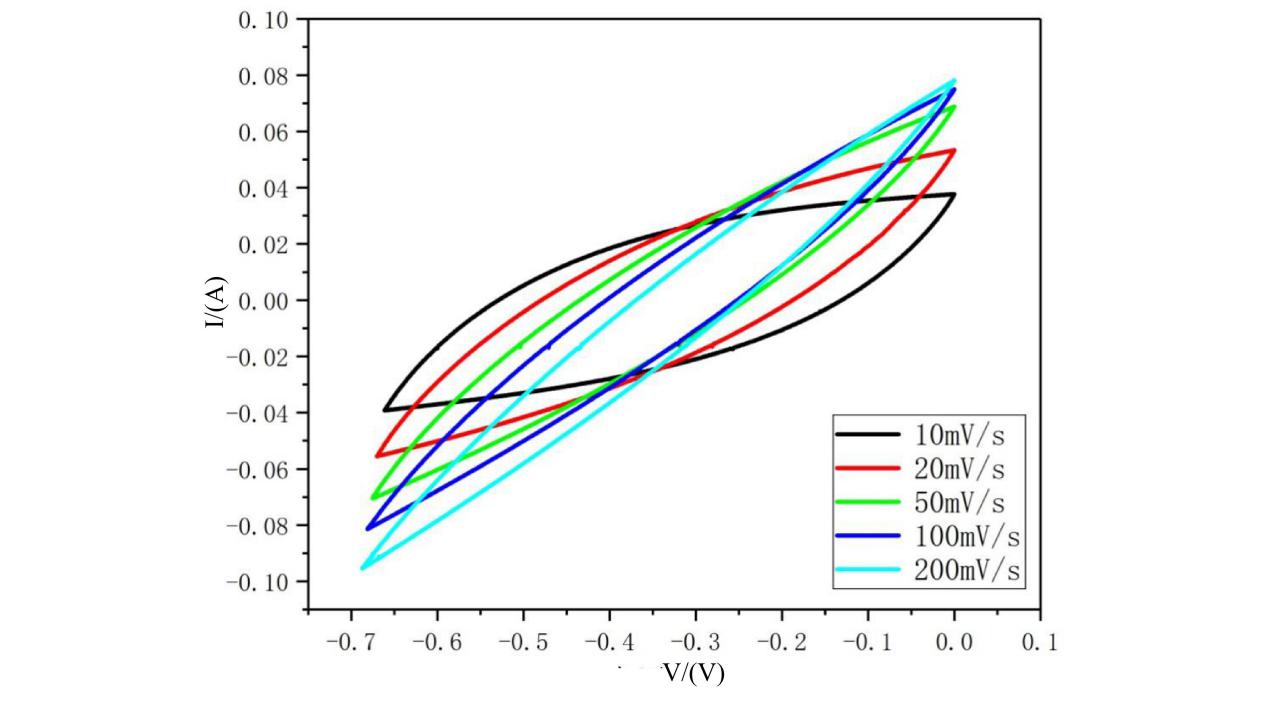


(a)


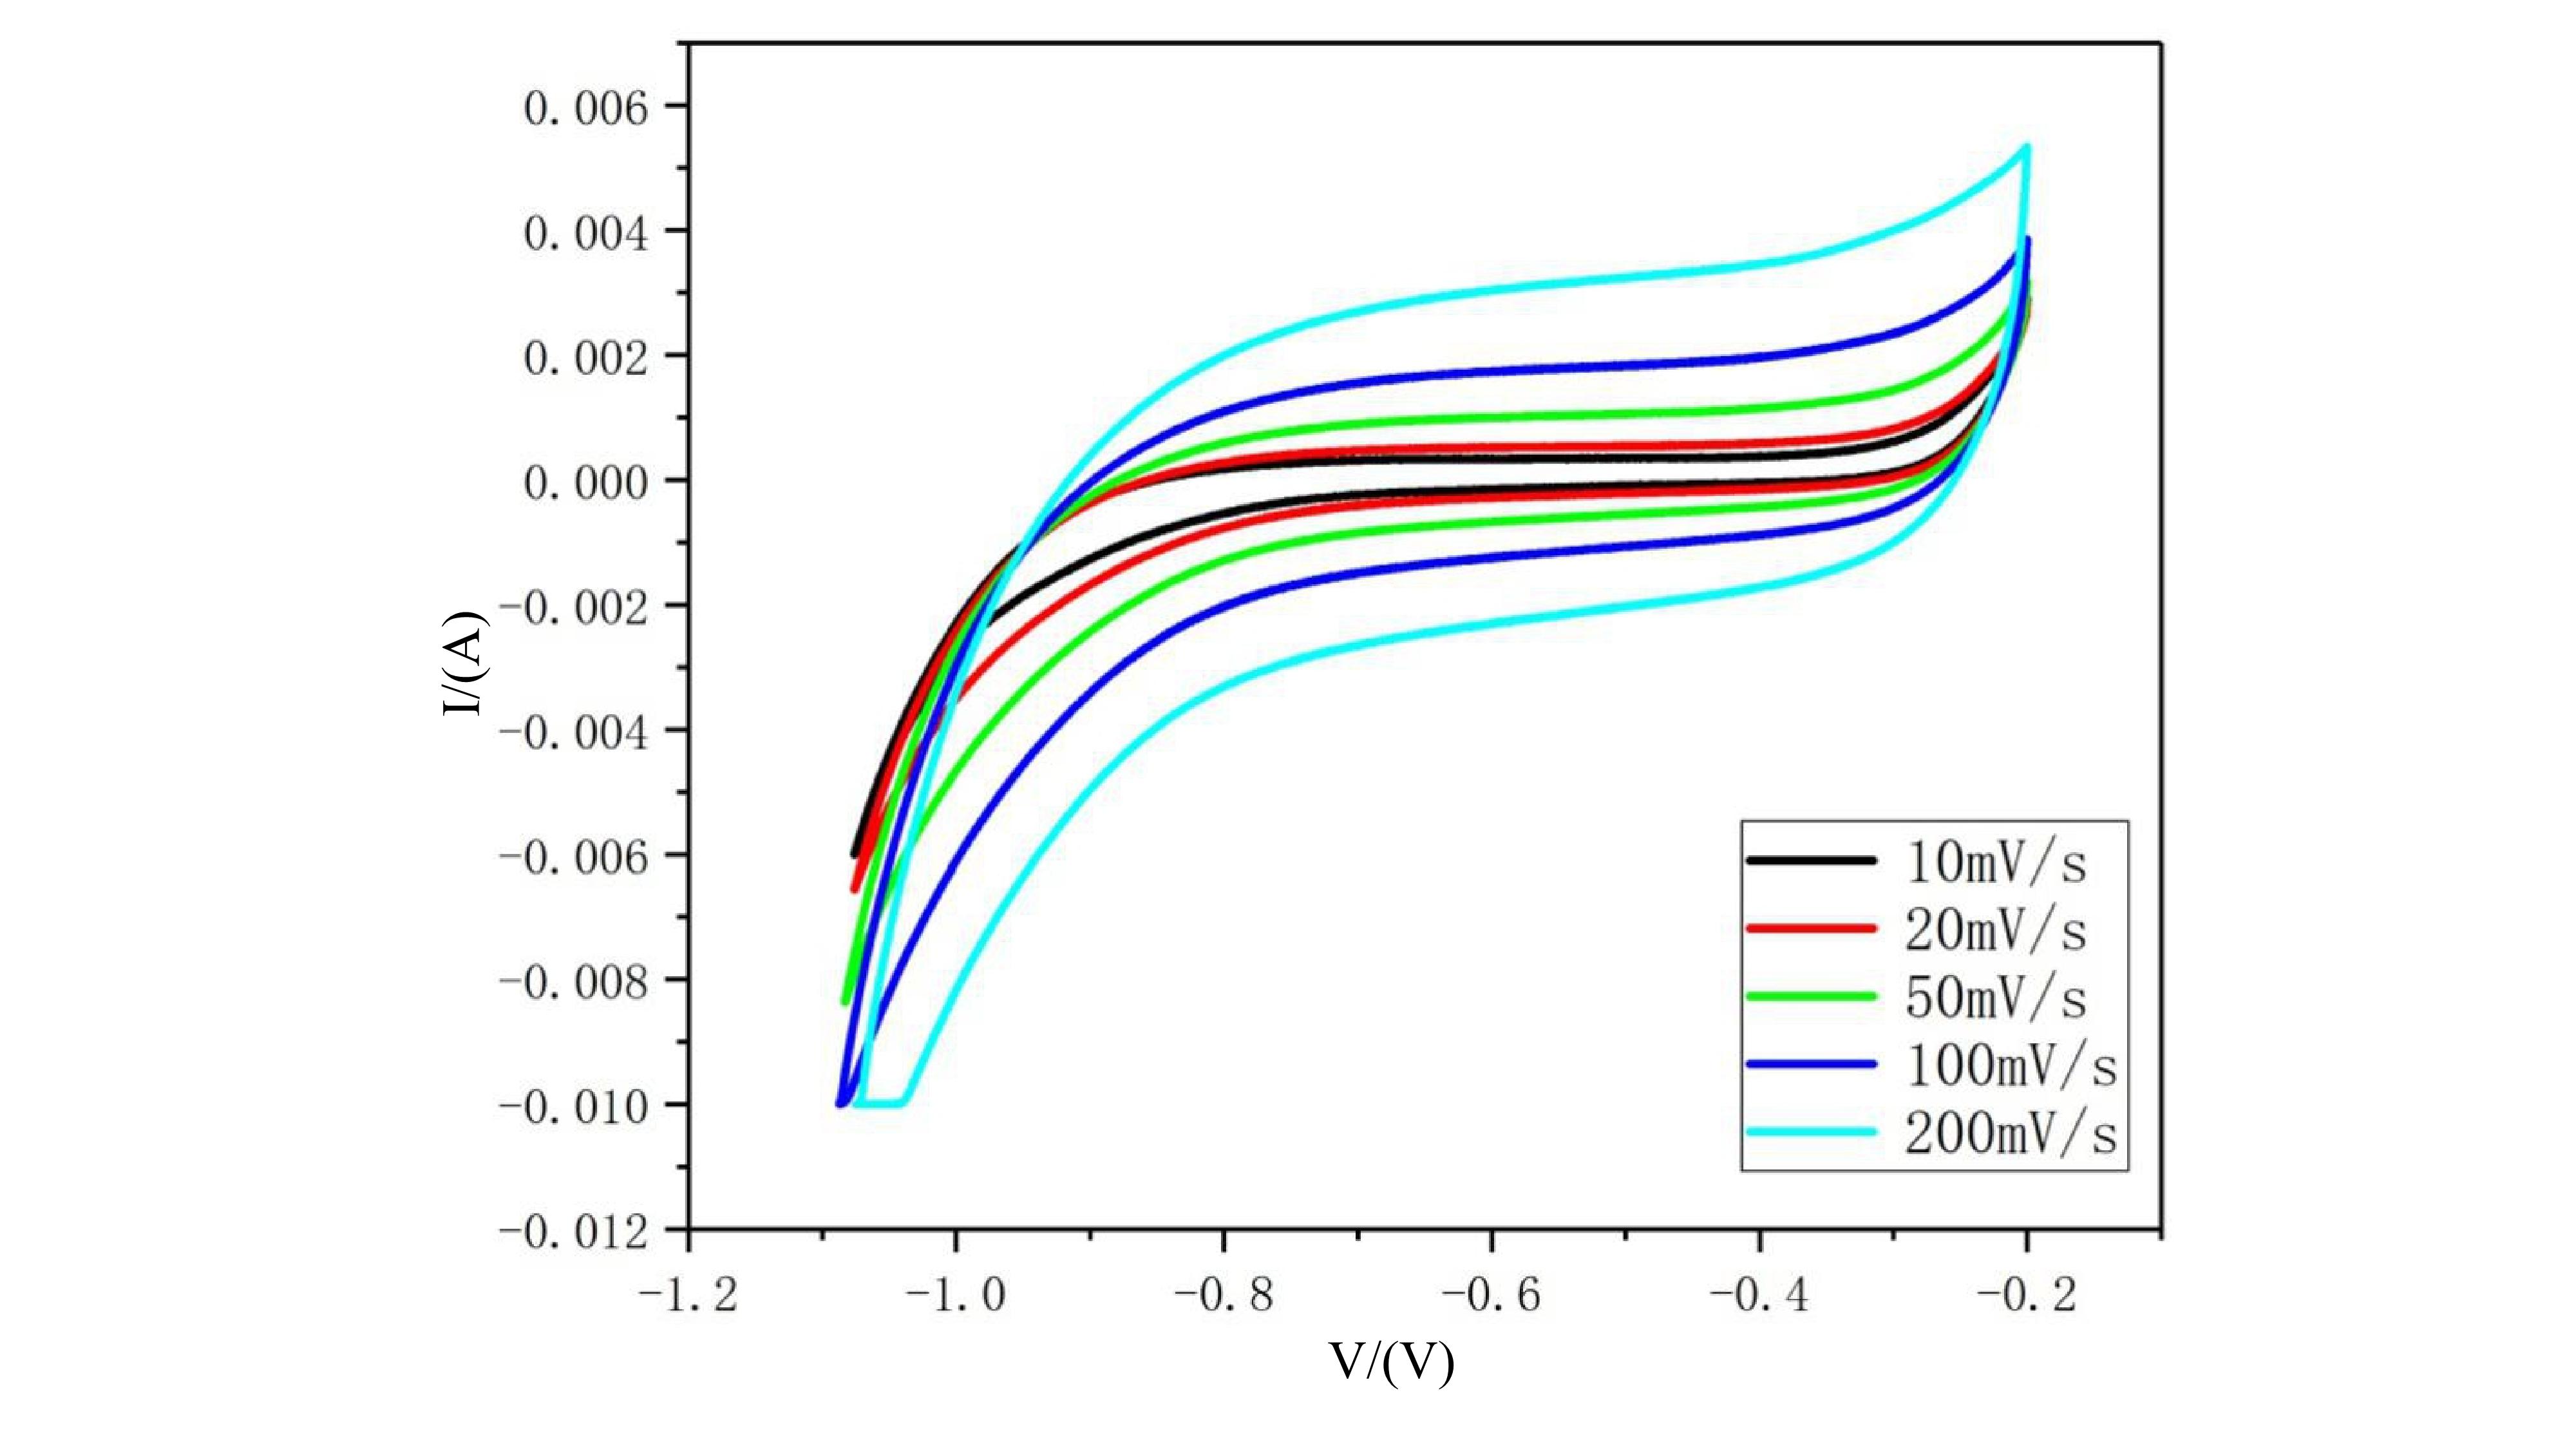


(b)


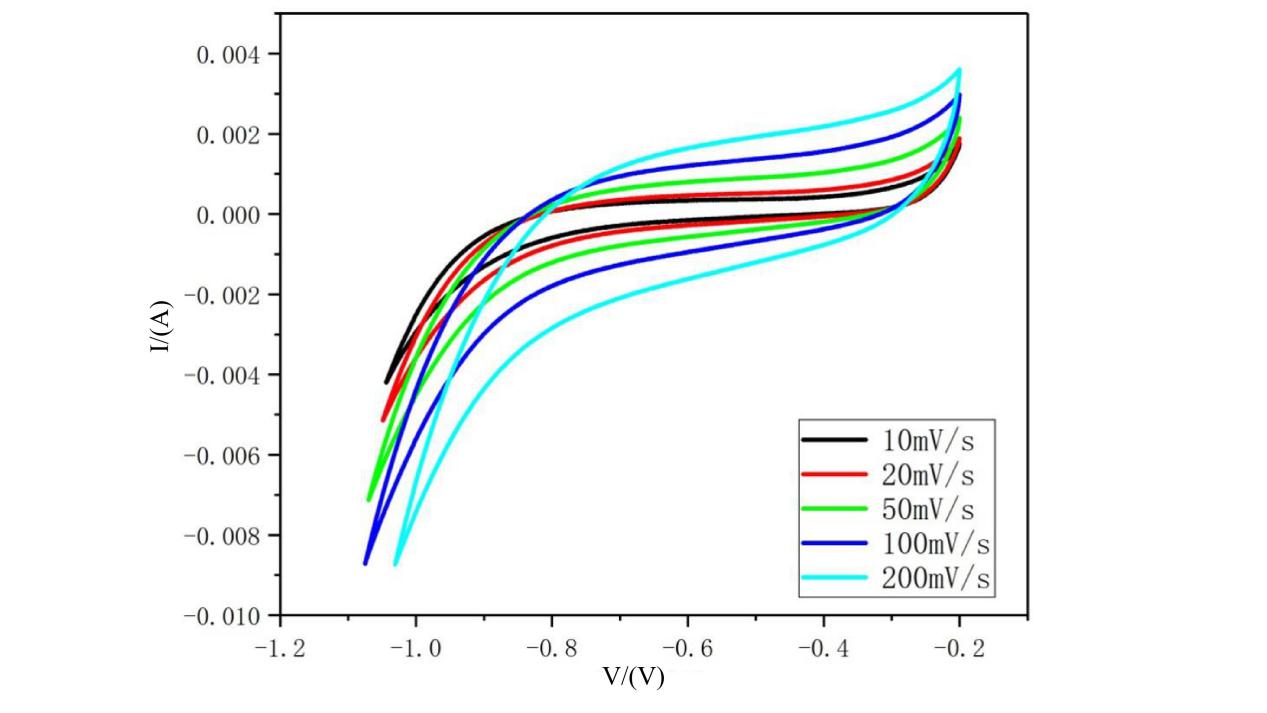


(c)

**Fig.AM1** Current-voltage curves, for the scanning rates of 10 mV/s, 20 mV/s, 50 mV/s, 100 mV/s, and 200 mV/s. ((a) Commercial activated carbon, scanning range = 0–7 V, m = 0.02024 g; (b) UiO-66 (acetic acid), scanning range = -0.2–-0.11 V, m = 0.01032 g; (c) UiO-66 (hydrochloric acid), scanning range = -0.2–-0.11 V, m = 0.01031 g)


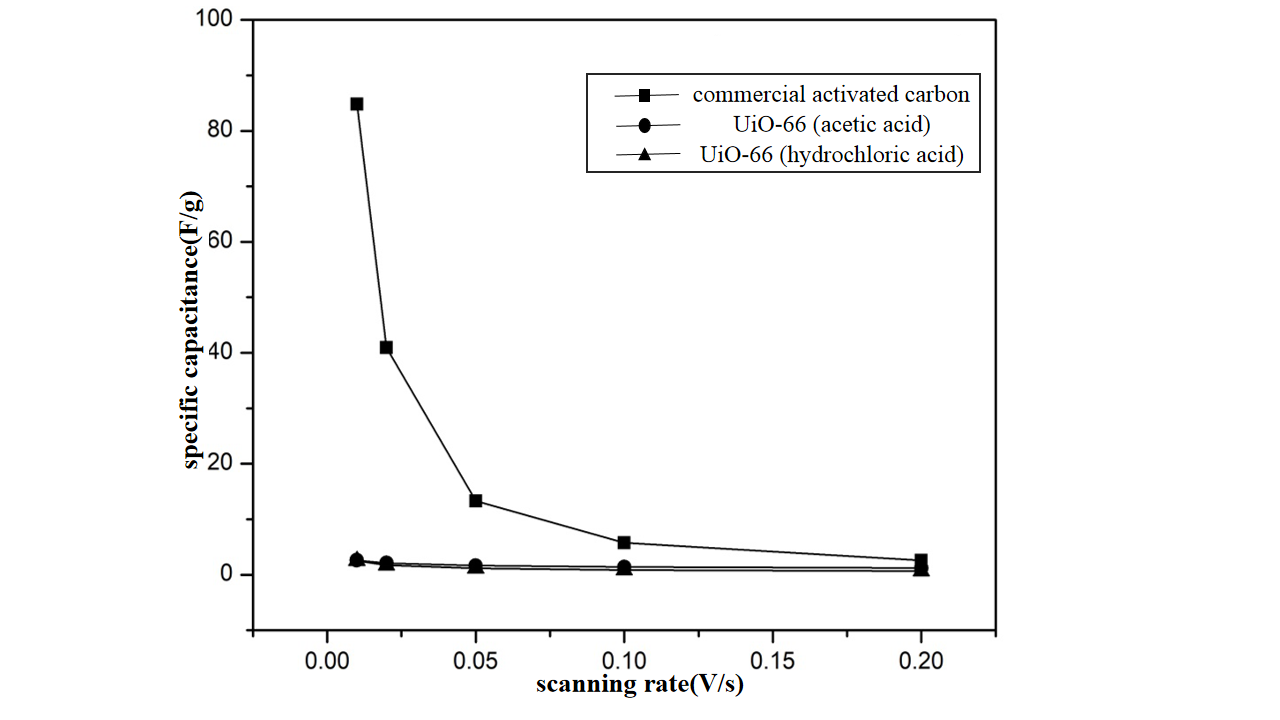


**Fig. AM2** Specific capacitance change, for the three electrode materials, for different scanning rates


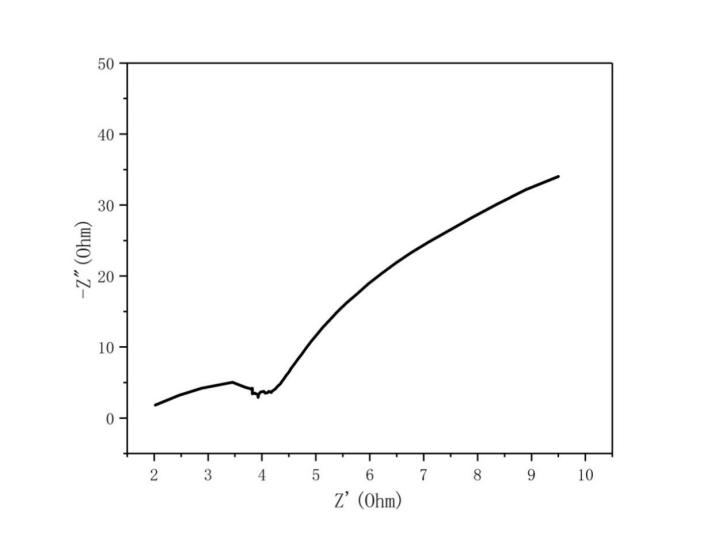


(a)


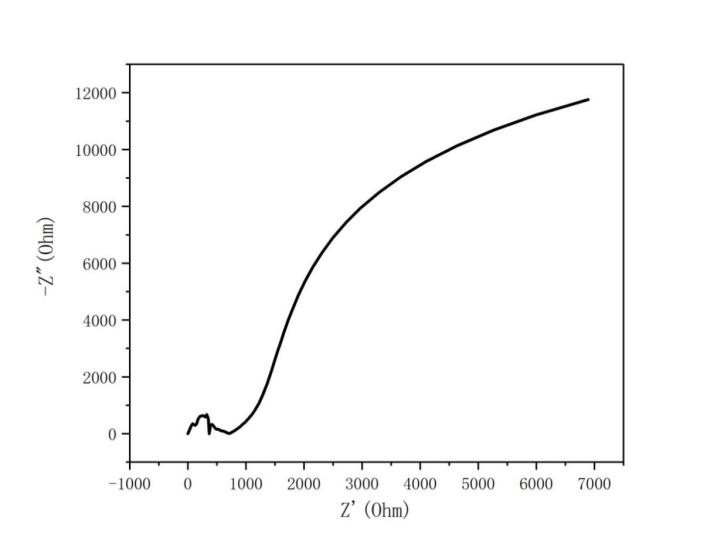


(b)


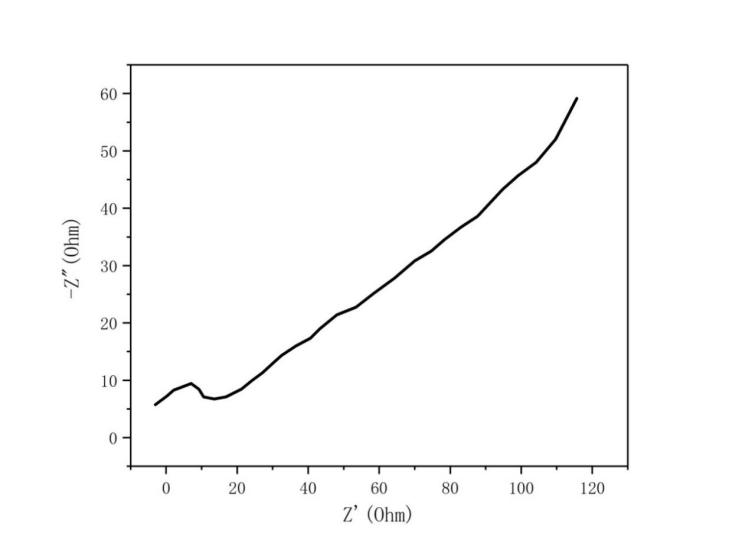


(c)

**Fig. AM3** AC impedance spectra of three different materials((a)commercial activated carbon; (b)UiO-66(acetic acid); (c)UiO-66(hydrochloric acid))


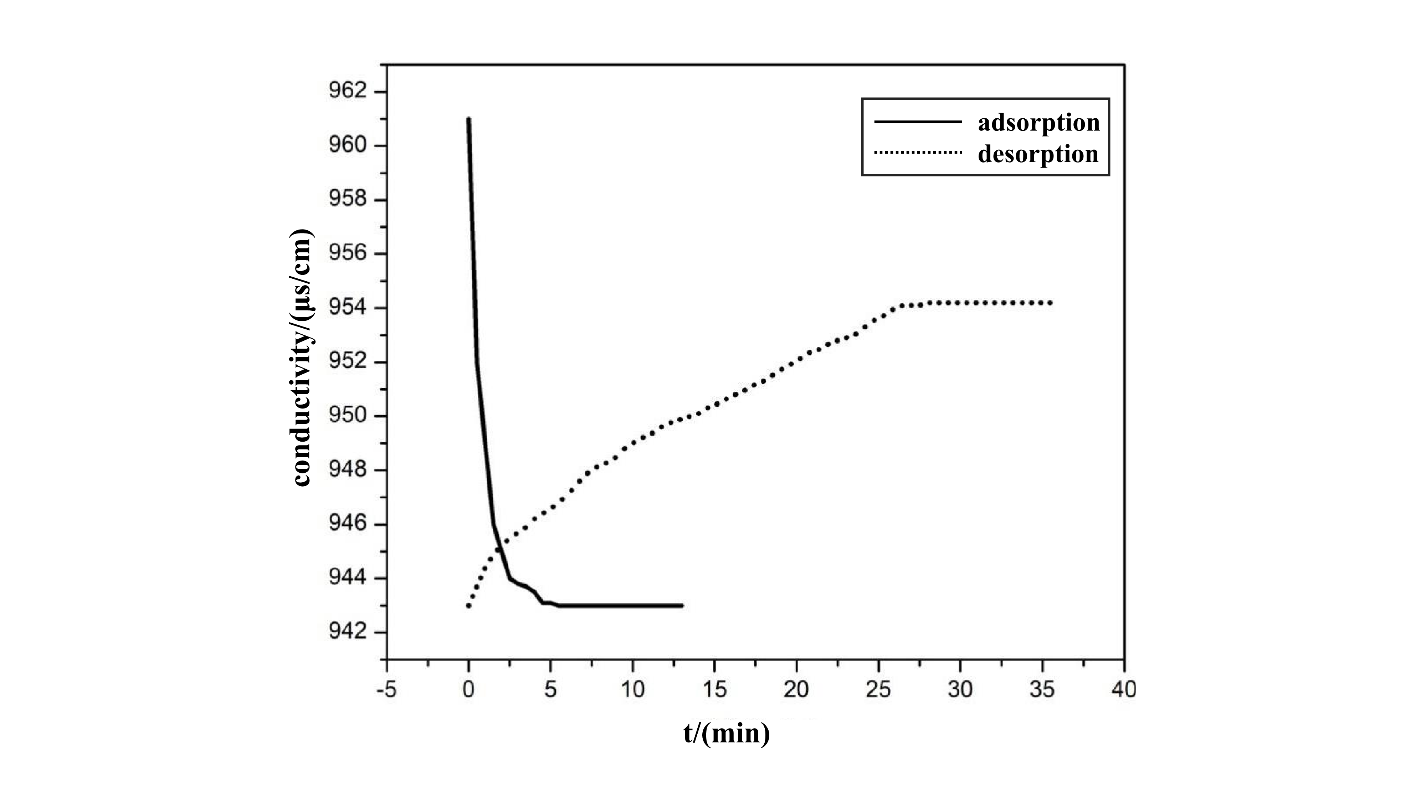


**Fig. AM4** Electrosorption-desorption curve of the NaCl solution with the initial concentration of 500 mg/L


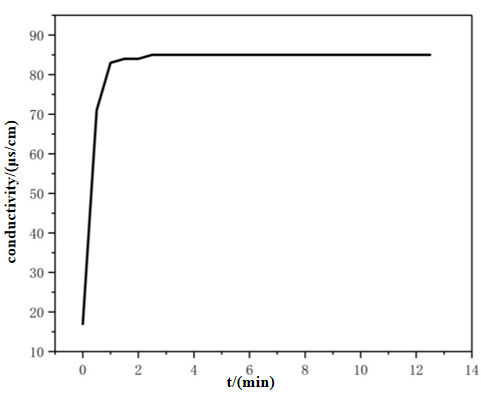


(a)


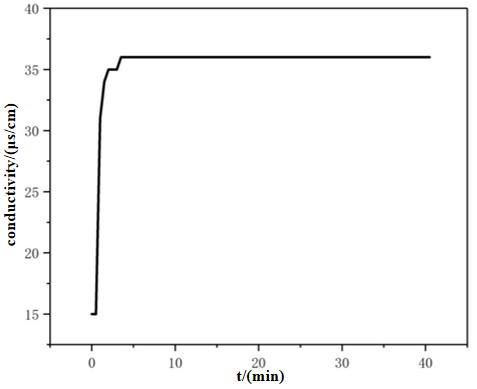


(b)

**Fig. AM5** Adsorption curve of the UiO-66 synthesized sample in the 30 mg/L sodium dihydrogen phosphate solution((a)UiO-66 (acetic acid); (b) UiO-66 (hydrochloric acid))


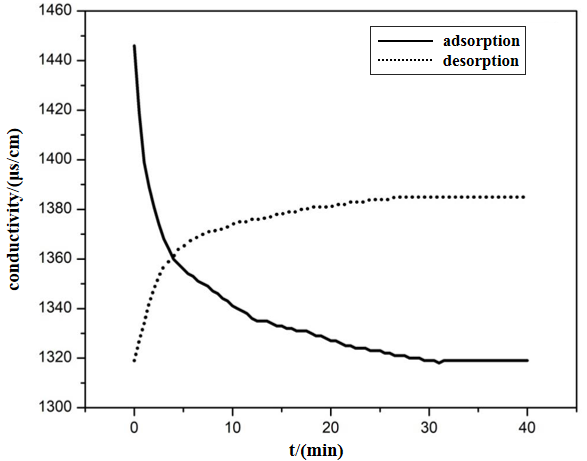


**Fig. AM6** Electrosorption-desorption curve of NaCl solution with initial concentration of 500 mg/L


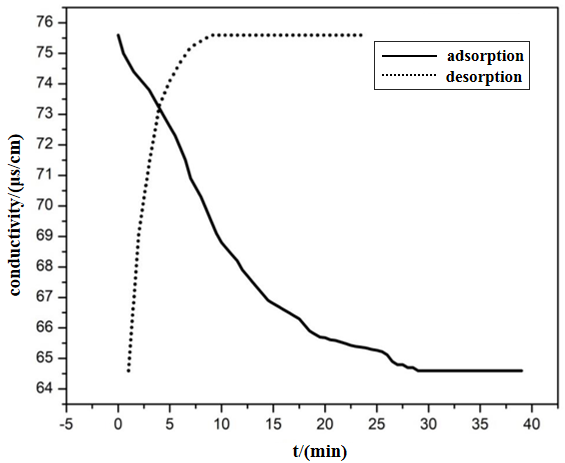


**Fig. AM7** Electrosorption-desorption curve of NaH2PO4 solution with initial concentration of 30 mg/L


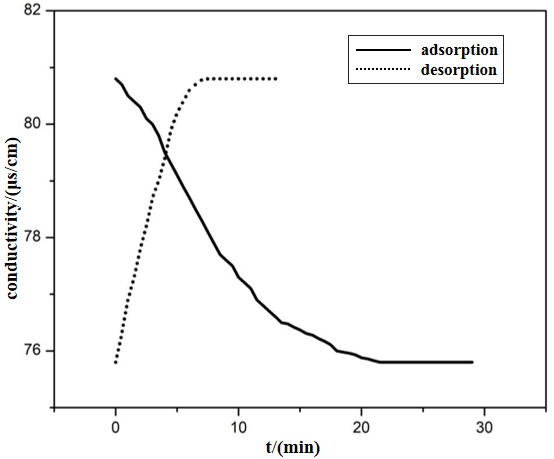


**Fig. AM8** Electrosorption-desorption curve of NaH2PO4 solution with initial concentration of 40 mg/L


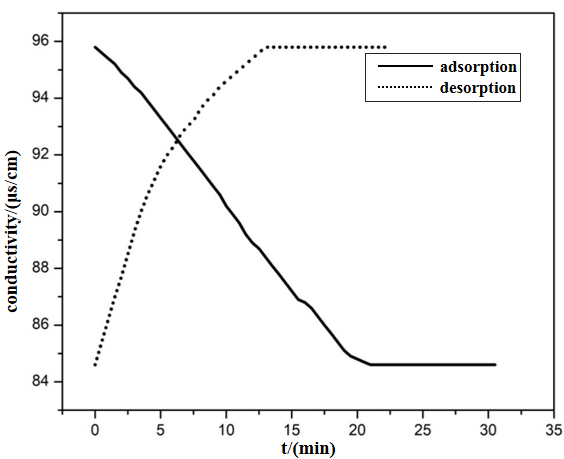


**Fig. AM9** Electrosorption-desorption curve of NaH2PO4 solution with initial concentration of 50 mg/L
